# Supplementary material for: Reassessment of chitosanase substrate specificities and classification
Source: PubMed Central journal article supplement (PMC5700058; doi:10.1038/s41467-017-01667-1), 2017-11-22
Supplement: 41467_2017_1667_MOESM1_ESM.pdf [file 41467_2017_1667_MOESM1_ESM.pdf]

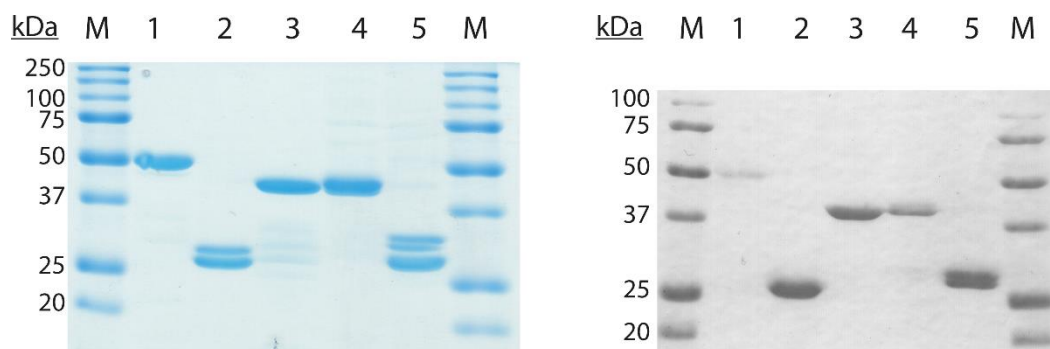

**Supplementary Figure 1 | SDS-PAGE (left) and corresponding Western-Blot (right) of ChiB (1), CSN-174 (2), CSN-7M (3), CSN-MN (4), and CSN-MHKI (5).** The enzymes were synthesized using *E. coli* Rosetta2 (DE3) [pLysSRARE2] production strains carrying the corresponding pET-22b(+):StrepII constructs. Six  $\mu\text{g}$  of purified protein was separated on the gel and stained with Serva Blue G250 (SERVA Electrophoresis GmbH, Germany) or via chemiluminescence with a Strep-Tactin® horseradish peroxidase conjugate (IBA, Germany) after blotting. Precision Plus Protein™ All Blue (Bio-Rad Laboratories GmbH, Germany) was used as protein standard (M).

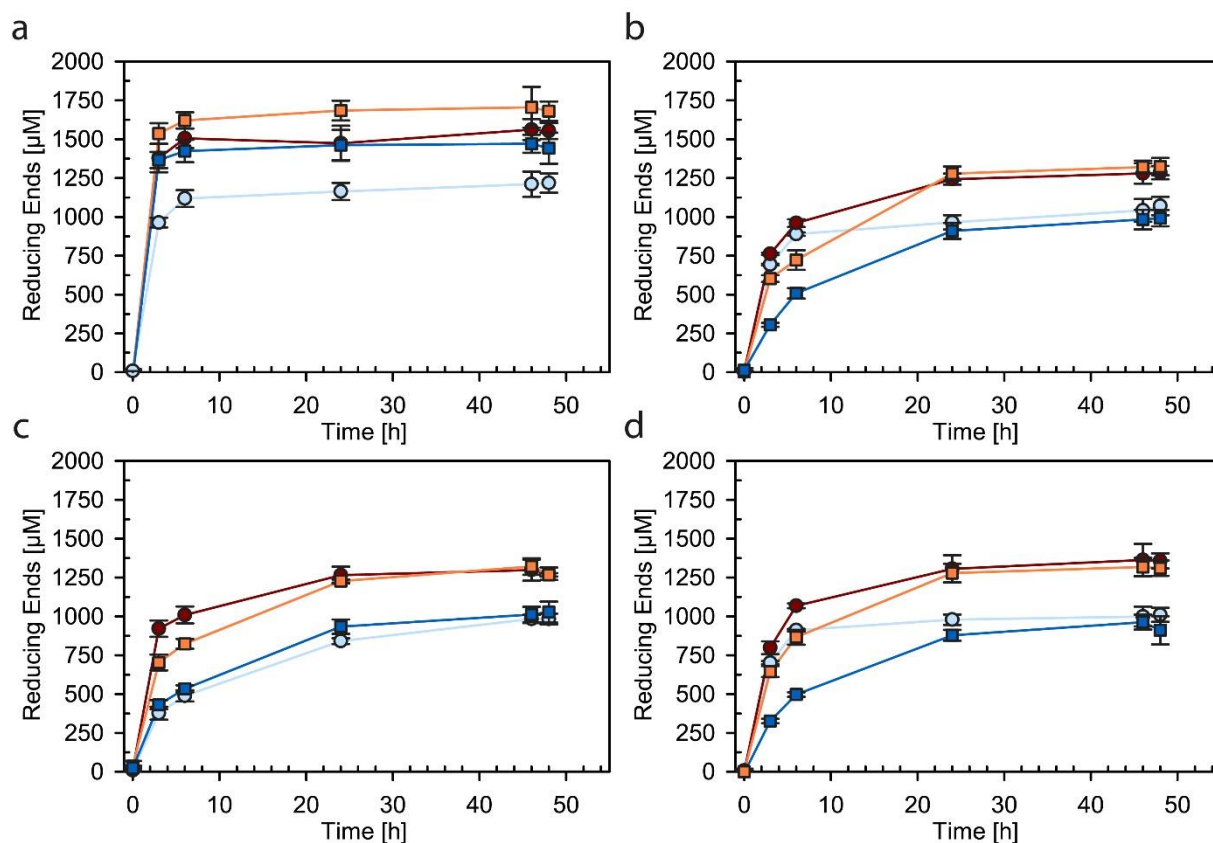

**Supplementary Figure 2 | Hydrolysis of a series of chitosans (DA 11% (light blue), DA 19% (red), DA 35% (orange), and DA 50% (dark blue)) with (a) CSN-174, (b) CSN-7M, (c) CSN-MN and (d) CSN-MHKI.** Samples were incubated for 48 h at 37°C and mild shaking. To check for end-point cleavage, fresh enzyme was added after 46 h. At each time point, reducing end concentrations were determined.

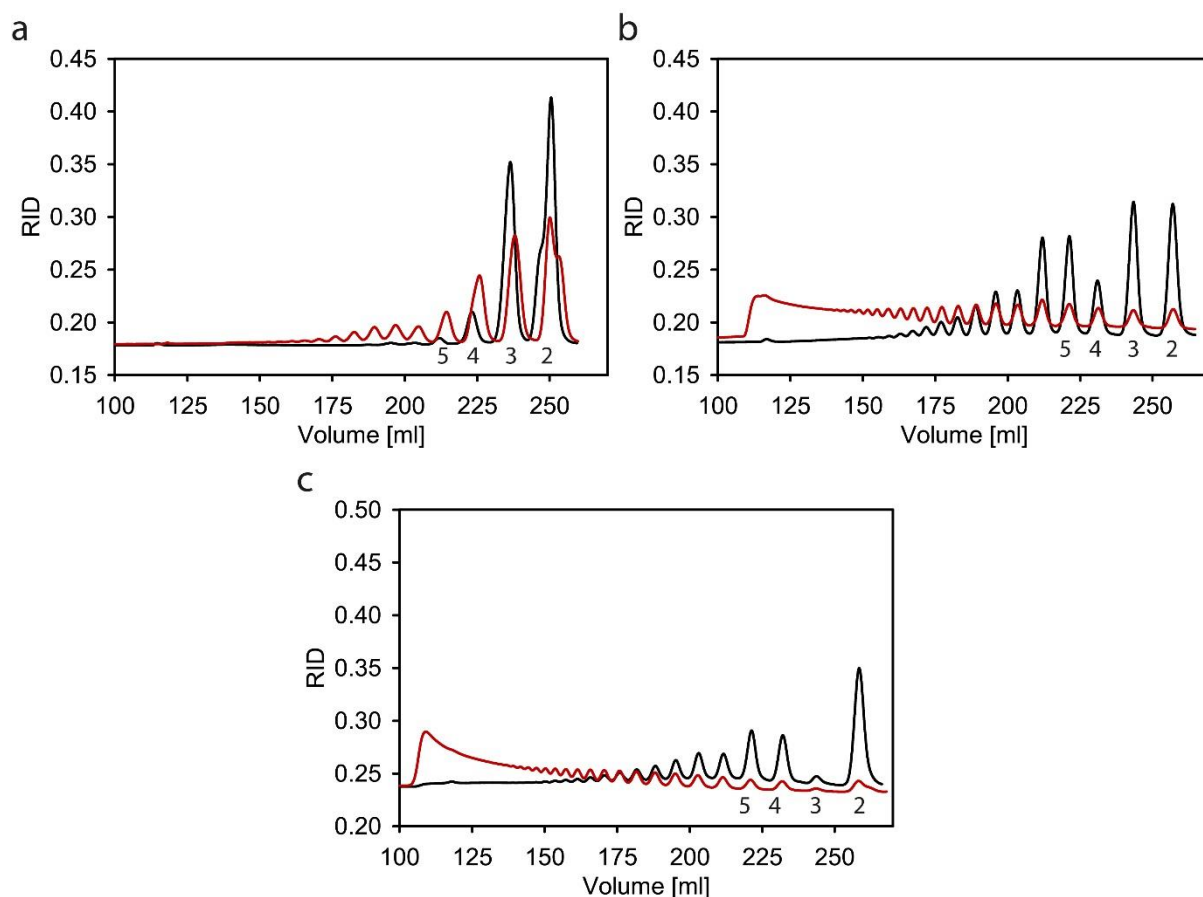

**Supplementary Figure 3 | Distribution of the degree of polymerization (DP) of oligomers produced with (a) CSN-174, (b) CSN-MN, and (c) CSN-MHKL.** The size distributions of hydrolysates of chitosans with  $F_A$  0.19 (black) and 0.50 (red) were analysed by Size Exclusion Chromatography (SEC) utilizing Refractive Index Detection (RID). For this purpose, the chitosans were hydrolysed with chitosanases until maximal cleavage was reached. Numbers below the peaks indicate the corresponding DPs as verified using UHPLC-ESI-MS. CSN-7M was not analysed, as it shows the same specificity like CSN-MN (compare Figures 3 and 4).

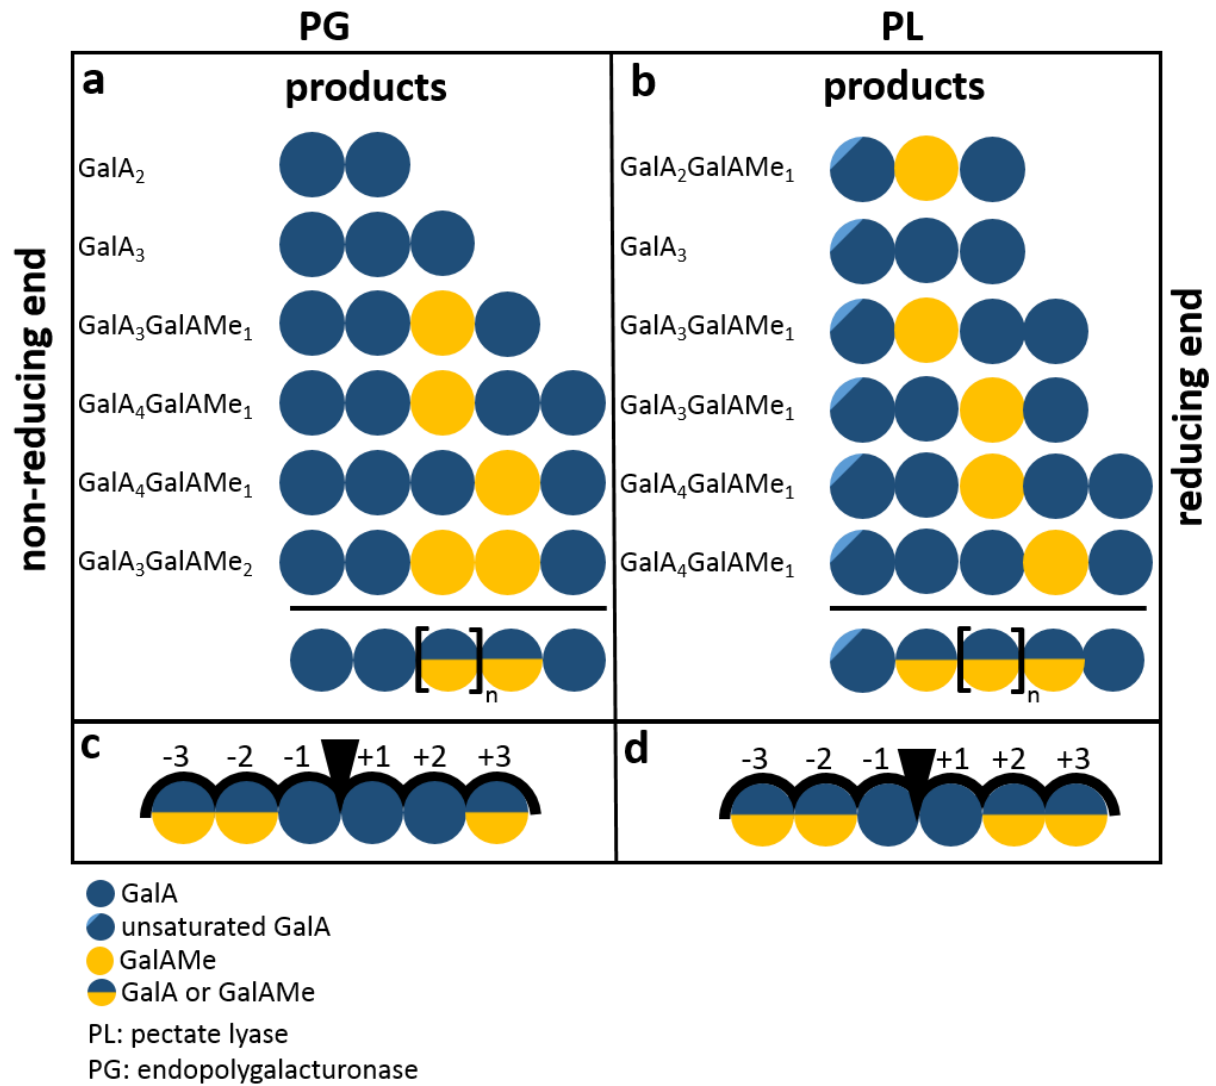

**Supplementary Figure 4 | Products (up to DP 5) and specificities of an endopolygalacturonidase (PG) from *Aspergillus* sp. and a pectate lyase (PL) from *Aspergillus niger* on partially methyl esterified pectins used as substrates. The products of (a) PG and (b) PL were used to identify the subsite specificities (c and d) of the two enzymes for methyl esterified and non-methyl esterified GalA units in the homogalacturonan chain.**

**Supplementary Table 1 | CSN-174 products after the hydrolysis of chitosan with F<sub>A</sub> 0.11-0.50.** Shown are the molar fractions of each oligomer with an abundance of  $\geq 1\%$  and their possible pattern of acetylation. When two or more patterns are given, sequencing of the oligomer was not complete. Data was gained by quantitative sequencing.

| F <sub>A</sub> | oligomer composition |                         |              |                |             |              |             |              |
|----------------|----------------------|-------------------------|--------------|----------------|-------------|--------------|-------------|--------------|
|                | replicate 1          |                         | replicate 2  |                | replicate 3 |              | replicate 4 |              |
| <b>0.11</b>    | 67.2%                | DD                      | 65.1%        | DD             | 56.4%       | DD           | 66.8%       | DD           |
|                | 16.0%                | DA                      | 14.2%        | DA             | 19.1%       | DA           | 14.7%       | DA           |
|                | 7.0%                 | DDA                     | 10.7%        | DDA            | 13.3%       | DDA          | 7.3%        | DDA          |
|                | 3.4%                 | ADD                     | 3.5%         | ADD            | 3.0%        | ADD          | 2.4%        | ADD          |
|                | 1.2%                 | AD                      | 1.2%         | ADDA           | 1.5%        | AD           | 2.4%        | DDD          |
|                | 1.1%                 | ADDA                    | 1.1%         | ADA            | 1.4%        | ADA          | 1.1%        | ADDA         |
|                | 1.1%                 | ADA                     |              |                | 1.2%        | ADDA         | 1.1%        | AD           |
| <b>0.19</b>    | 48.4%                | DD                      | 47.3%        | DD             | 41.1%       | DD           | 53.1%       | DD           |
|                | 21.8%                | DA                      | 20.5%        | DA             | 24.1%       | DA           | 22.9%       | DA           |
|                | 10.0%                | DDA                     | 13.5%        | DDA            | 15.0%       | DDA          | 9.3%        | DDA          |
|                | 5.9%                 | ADD                     | 5.5%         | ADD            | 4.4%        | ADD          | 3.3%        | ADD          |
|                | 2.9%                 | ADDA<br>DADA            | 2.8%         | ADA            | 3.3%        | ADA          | 2.6%        | ADAD<br>ADDA |
|                | 2.8%                 | ADA                     | 2.3%         | ADDA<br>DADA   | 2.8%        | ADDA         | 2.5%        | ADDA<br>DADA |
|                | 2.6%                 | ADAD<br>ADDA            | 2.2%         | ADAD<br>ADDA   | 1.8%        | AD           | 2.0%        | ADA          |
|                | 1.7%                 | AADD                    | 1.5%         | AADD           | 1.6%        | AADA         | 1.4%        | AADD         |
|                | 1.4%                 | AADA                    | 1.3%         | AADA           | 1.4%        | AADD         | 1.4%        | DAD          |
|                | 1.2%                 | AD                      | 1.0%         | AD             | 1.0%        | DAD          | 1.4%        | AADA         |
|                |                      |                         |              |                |             |              | 1.3%        | AD           |
| <b>0.35</b>    | 29.8%                | DD                      | 31.3%        | DD             | 27.9%       | DA           | 30.3%       | DD           |
|                | 27.3%                | DA                      | 27.2%        | DA             | 22.5%       | DD           | 28.3%       | DA           |
|                | 10.1%                | DDA                     | 12.3%        | DDA            | 16.7%       | DDA          | 10.7%       | DDA          |
|                | 7.2%                 | ADD                     | 6.3%         | ADD            | 6.2%        | ADA          | 5.1%        | ADD          |
|                | 5.6%                 | ADA                     | 4.6%         | ADA            | 6.0%        | ADD          | 4.7%        | ADA          |
|                | 4.2%                 | ADDA                    | 4.4%         | ADDA<br>DADA   | 5.1%        | ADDA         | 4.6%        | ADDA         |
|                | 3.8%                 | AADD                    | 4.1%         | ADAD<br>ADDA   | 3.2%        | AADA         | 3.2%        | AADA         |
|                | 3.1%                 | AADA                    | 2.7%         | AADD           | 2.8%        | AADD         | 2.6%        | AADD         |
|                | 1.4%                 | AD                      | 2.6%         | AADA           | 1.9%        | AD           | 1.9%        | DAD          |
|                | 1.4%                 | AADAD<br>AADDA          | 1.5%         | DAD            | 1.8%        | AADDA        | 1.9%        | AADDA        |
|                | 1.3%                 | DADA                    | 1.3%         | AD             |             |              | 1.5%        | AD           |
|                | 1.3%                 | AADDA<br>DAADA          | 1.3%         | AADDA          |             |              | 1.2%        | AAADD        |
| 1.2%           | DAD                  | 1.2%                    | DAAD<br>DADA |                |             | 1.1%         | AAADA       |              |
| <b>0.50</b>    | 25.5%                | DA                      | 24.6%        | DA             | 26.3%       | DA           | 32.9%       | DA           |
|                | 14.5%                | DD                      | 13.4%        | DD             | 12.0%       | ADA          | 17.8%       | DD           |
|                | 12.2%                | ADA                     | 12.0%        | ADA            | 11.6%       | DDA          | 10.1%       | ADA          |
|                | 8.3%                 | AADA                    | 11.2%        | DDA            | 11.4%       | DD           | 8.7%        | AADA         |
|                | 6.9%                 | ADD                     | 7.2%         | AADA           | 8.0%        | AADA         | 7.7%        | DDA          |
|                | 6.8%                 | DDA                     | 6.4%         | ADD            | 7.4%        | ADAD<br>ADDA | 7.2%        | ADAD<br>ADDA |
|                | 6.7%                 | ADDA<br>DADA            | 6.3%         | ADDA<br>DADA   | 7.2%        | ADDA<br>DADA | 7.0%        | ADDA<br>DADA |
|                | 6.6%                 | ADAD<br>ADDA            | 6.2%         | ADAD<br>ADDA   | 5.3%        | ADD          | 4.7%        | ADD          |
|                | 4.2%                 | AADD                    | 3.3%         | AADD           | 3.0%        | AADD         | 4.0%        | AADD         |
|                | 4.0%                 | AAADD<br>AADAD<br>AADDA | 2.7%         | AAADA          | 2.9%        | AAADA        | 2.3%        | DAD          |
|                | 3.2%                 | AAADA                   | 2.4%         | AADDA<br>DAADA | 2.6%        | AADDA        | 1.5%        | ADAD<br>DAAD |
|                | 2.6%                 | AADDA<br>DAADA<br>DADAA | 2.0%         | AADAD<br>AADDA | 1.4%        | AAADD        | 1.5%        | AD           |
|                | 2.0%                 | AAADD<br>AADAD<br>DAAAD | 1.9%         | DAD            | 1.4%        | AD           | 1.3%        | DAAD<br>DADA |
|                | 1.3%                 | AD                      | 1.5%         | AAADD          | 1.2%        | AAAADA       |             |              |

D: GlcN; A: GlcNAc.

**Supplementary Table 1 | Continued**

| <b>F<sub>A</sub></b> | <b>oligomer composition</b> |        |                    |              |                    |  |                    |  |
|----------------------|-----------------------------|--------|--------------------|--------------|--------------------|--|--------------------|--|
|                      | <b>replicate 1</b>          |        | <b>replicate 2</b> |              | <b>replicate 3</b> |  | <b>replicate 4</b> |  |
| <b>0.50</b>          | 1.0%                        | AAAADA | 1.3%               | DAAD<br>DADA |                    |  |                    |  |
|                      |                             |        | 1.2%               | ADAD<br>DAAD |                    |  |                    |  |
|                      |                             |        | 1.2%               | AD           |                    |  |                    |  |

D: GlcN; A: GlcNAc.

**Supplementary Table 2 | CSN-7M products after the hydrolysis of chitosan with F<sub>A</sub> 0.11-0.50.** Shown are the molar fractions of each oligomer with an abundance of  $\geq 1\%$  and their possible pattern of acetylation. When two or more patterns are given, sequencing of the oligomer was not complete. Data was gained by quantitative sequencing.

| F <sub>A</sub> | oligomer composition |                         |             |                                           |             |                                                                                     |             |  |
|----------------|----------------------|-------------------------|-------------|-------------------------------------------|-------------|-------------------------------------------------------------------------------------|-------------|--|
|                | replicate 1          |                         | replicate 2 |                                           | replicate 3 |                                                                                     | replicate 4 |  |
| <b>0.11</b>    | 53.8%                | DD                      | 56.1%       | DD                                        | 57.2%       | DD                                                                                  |             |  |
|                | 16.1%                | DDD                     | 14.5%       | DDD                                       | 14.5%       | DDD                                                                                 |             |  |
|                | 6.6%                 | ADDD                    | 6.1%        | ADDD                                      | 6.2%        | ADDD                                                                                |             |  |
|                | 6.5%                 | DADDD                   | 5.3%        | DADDD                                     | 5.6%        | DADDD                                                                               |             |  |
|                | 2.8%                 | ADD                     | 3.3%        | DADD                                      | 3.0%        | ADD                                                                                 |             |  |
|                | 2.5%                 | DADD                    | 3.0%        | ADD                                       | 3.0%        | DADD                                                                                |             |  |
|                | 2.1%                 | ADADD<br>DAADD          | 1.9%        | DDADD                                     | 2.2%        | ADADD<br>DAADD                                                                      |             |  |
|                | 1.7%                 | DDADD                   | 1.9%        | ADADD<br>ADDAD                            | 1.6%        | DDADD                                                                               |             |  |
|                | 1.5%                 | ADADD<br>ADDAD          | 1.0%        | ADADD<br>ADDAD                            | 1.4%        | AADDD<br>ADADD<br>ADDAD<br>DAADD<br>DADDD<br>DDAADD                                 |             |  |
|                | 1.4%                 | DDAD                    |             |                                           | 1.4%        | DDAD                                                                                |             |  |
|                | 1.0%                 | ADADD<br>ADDAD<br>ADDAD |             |                                           | 1.4%        | DAADD<br>DADDD<br>DADDAD<br>DADDDA<br>DDAADD<br>DDADAD<br>DDADDA<br>DDDAAD<br>DDDDA |             |  |
|                |                      |                         |             |                                           | 1.3%        | ADADD<br>ADDAD                                                                      |             |  |
|                |                      |                         |             |                                           | 1.2%        | DAADD<br>DADAD                                                                      |             |  |
|                | <b>0.19</b>          | 43.6%                   | DD          | 44.0%                                     | DD          | 44.8%                                                                               | DD          |  |
| 11.1%          |                      | DDD                     | 12.1%       | DDD                                       | 11.3%       | DDD                                                                                 |             |  |
| 8.7%           |                      | ADDD                    | 9.1%        | ADDD                                      | 8.3%        | ADDD                                                                                |             |  |
| 7.2%           |                      | DADDD                   | 7.7%        | DADDD                                     | 7.1%        | DADDD                                                                               |             |  |
| 4.2%           |                      | DADD                    | 4.5%        | ADADD<br>DAADD                            | 4.8%        | DADD                                                                                |             |  |
| 3.9%           |                      | ADD                     | 3.8%        | ADD                                       | 4.2%        | ADADD<br>DAADD                                                                      |             |  |
| 3.9%           |                      | DDADD                   | 3.3%        | DADD                                      | 3.8%        | ADADD<br>ADDAD                                                                      |             |  |
| 3.5%           |                      | ADADD<br>ADDAD          | 3.2%        | DDADD                                     | 3.5%        | ADD                                                                                 |             |  |
| 2.6%           |                      | ADADD<br>DAADD          | 3.1%        | ADADD<br>ADDAD                            | 3.4%        | DDADD                                                                               |             |  |
| 2.2%           |                      | DAADD<br>DADAD          | 2.5%        | DAADD<br>DADAD                            | 2.2%        | ADADD<br>DAADD                                                                      |             |  |
| 1.9%           |                      | ADADD<br>ADDAD          | 1.8%        | ADADD<br>DAADD                            | 2.1%        | ADADD<br>ADDAD<br>ADDAD<br>ADDADA                                                   |             |  |
| 1.6%           |                      | DAADD<br>DADAD          | 1.7%        | DAADD<br>DADAD<br>DADAD                   | 1.7%        | DAADD<br>DADAD                                                                      |             |  |
| 1.3%           |                      | DDAD                    | 1.6%        | DDAD                                      | 1.4%        | DAADD<br>DADAD<br>DADAD<br>DADDDA                                                   |             |  |
| 1.1%           |                      | AADDD                   | 1.2%        | ADADD<br>ADDAD<br>ADDAD                   | 1.4%        | ADDAD<br>DADAD                                                                      |             |  |
|                |                      |                         | 1.1%        | ADDAD<br>ADDAD<br>DADAD<br>DADAD<br>DADAD | 1.3%        | ADDAD<br>ADDAD<br>ADDADA<br>DADAD<br>DADAD<br>DADDDA                                |             |  |
|                |                      |                         | 1.1%        | ADDAD<br>DADAD                            | 1.3%        | ADDAD<br>ADDAD<br>DADAD<br>DADAD<br>DDAADD<br>DDADAD                                |             |  |
|                |                      |                         |             |                                           | 1.0%        | DDAD                                                                                |             |  |

D: GlcN; A: GlcNAc.

Supplementary Table 2 | Continued

| F <sub>A</sub> | oligomer composition |                                                        |             |                                           |             |                                           |             |  |
|----------------|----------------------|--------------------------------------------------------|-------------|-------------------------------------------|-------------|-------------------------------------------|-------------|--|
|                | replicate 1          |                                                        | replicate 2 |                                           | replicate 3 |                                           | replicate 4 |  |
| <b>0.35</b>    | 20.9%                | DADDD                                                  | 20.5%       | DADDD                                     | 19.2%       | DADDD                                     |             |  |
|                | 18.6%                | DD                                                     | 18.7%       | DD                                        | 17.8%       | DD                                        |             |  |
|                | 12.2%                | ADDD                                                   | 12.1%       | ADDD                                      | 17.8%       | DDD                                       |             |  |
|                | 10.5%                | DDD                                                    | 10.2%       | DDD                                       | 9.7%        | ADDD                                      |             |  |
|                | 7.0%                 | DDADD                                                  | 6.8%        | DDADD                                     | 5.7%        | DDADD                                     |             |  |
|                | 4.9%                 | DADD                                                   | 5.5%        | ADADD<br>DAADD                            | 4.5%        | ADADD<br>DAADD                            |             |  |
|                | 3.9%                 | DAADD<br>DADADD                                        | 4.1%        | DADD                                      | 4.4%        | DDADD                                     |             |  |
|                | 3.8%                 | ADADD<br>DAADD                                         | 4.1%        | ADADD<br>DAADD                            | 4.0%        | AADD<br>ADADD<br>DAADD                    |             |  |
|                | 3.3%                 | DDADD                                                  | 3.5%        | DAADD<br>DADDA                            | 3.3%        | DAADD<br>DADADD                           |             |  |
|                | 3.2%                 | ADADD                                                  | 3.1%        | DDADD                                     | 3.1%        | AADD                                      |             |  |
|                | 3.0%                 | DAADD                                                  | 3.0%        | AADD                                      | 3.0%        | DAADD<br>DADAD<br>DADDA<br>DDAAD<br>DDADA |             |  |
|                | 2.2%                 | AADD                                                   | 2.6%        | ADADD<br>ADDDA                            | 2.5%        | DDDD                                      |             |  |
|                | 1.6%                 | ADD                                                    | 2.6%        | DAADD<br>DADADD<br>DADDAD                 | 2.4%        | DADD                                      |             |  |
|                | 1.5%                 | DDDDD                                                  | 2.1%        | ADADD<br>ADDADD<br>ADDAD                  | 2.1%        | AADD<br>ADADD<br>ADDAD<br>ADDDA           |             |  |
|                | 1.1%                 | ADDADD<br>DADADD                                       | 1.6%        | ADD                                       | 1.8%        | ADADD<br>ADDADD                           |             |  |
|                | 1.1%                 | ADADD<br>ADDADD                                        | 1.5%        | DDDDD                                     | 1.4%        | ADD                                       |             |  |
|                |                      |                                                        |             |                                           | 1.0%        | DDDDD                                     |             |  |
| <b>0.50</b>    | 17.0%                | DADDD                                                  | 20.7%       | DADDD                                     | 17.1%       | DADDD                                     |             |  |
|                | 13.6%                | ADDD                                                   | 14.2%       | DD                                        | 15.4%       | DD                                        |             |  |
|                | 13.4%                | DD                                                     | 12.0%       | ADDD                                      | 12.1%       | ADDD                                      |             |  |
|                | 7.9%                 | DAADD                                                  | 10.3%       | DDD                                       | 8.9%        | DDD                                       |             |  |
|                | 5.8%                 | DAADD<br>DADADD<br>DADDAD<br>DADDDA                    | 8.9%        | ADADD<br>DAADD                            | 6.7%        | ADADD<br>DAADD                            |             |  |
|                | 5.4%                 | ADADD<br>DAADD                                         | 7.0%        | DAADD<br>DADADD                           | 5.3%        | DADD                                      |             |  |
|                | 5.4%                 | DADD                                                   | 6.9%        | AADD<br>ADADD<br>ADDAD<br>ADDDA           | 4.7%        | DAADD                                     |             |  |
|                | 5.0%                 | DDD                                                    | 6.6%        | AADD<br>ADADD<br>DAADD                    | 4.1%        | DAADD<br>DADADD                           |             |  |
|                | 4.7%                 | DDADD                                                  | 4.5%        | DDADD                                     | 3.9%        | ADADD<br>ADDADD                           |             |  |
|                | 4.4%                 | ADADD                                                  | 3.9%        | DAADD<br>DADAD<br>DADDA<br>DDAAD<br>DDADA | 3.7%        | AADD                                      |             |  |
|                | 3.9%                 | AADD                                                   | 3.5%        | DADD                                      | 3.7%        | DDADD                                     |             |  |
|                | 2.6%                 | ADD                                                    | 3.3%        | ADDAD<br>DADAD<br>DDAAD                   | 3.4%        | ADADD                                     |             |  |
|                | 2.4%                 | DDADD                                                  | 2.6%        | DDADD                                     | 3.4%        | ADD                                       |             |  |
|                | 2.0%                 | ADDADD<br>ADDAD<br>DADADD<br>DADDAD<br>DDAAD<br>DDADAD | 2.6%        | ADADD<br>ADDADD                           | 2.1%        | DDADD                                     |             |  |
|                | 2.0%                 | ADDADD<br>ADDAD<br>ADDDA<br>DADADD<br>DADDAD<br>DADDDA | 2.6%        | ADD                                       | 1.3%        | ADDADD<br>DADADD                          |             |  |
|                | 1.7%                 | AAADD                                                  | 1.1%        | DDDDD                                     | 1.1%        | AADD                                      |             |  |
|                | 1.6%                 | ADADD<br>ADDADD<br>ADDAD<br>ADDDA                      | 1.0%        | AAADD<br>AADADD<br>ADAADD                 | 1.1%        | DDDDD                                     |             |  |

D: GlcN; A: GlcNAc.

**Supplementary Table 2 | Continued**

| F <sub>A</sub> | oligomer composition |       |             |      |             |                                                          |             |  |
|----------------|----------------------|-------|-------------|------|-------------|----------------------------------------------------------|-------------|--|
|                | replicate 1          |       | replicate 2 |      | replicate 3 |                                                          | replicate 4 |  |
| <b>0.50</b>    | 1.5%                 | DDDDD | 1.0%        | DDDD | 1.0%        | ADAADD<br>ADADAD<br>ADADDA<br>DAAADD<br>DAADAD<br>DAADDA |             |  |
|                | 1.1%                 | AADD  |             |      |             |                                                          |             |  |
|                | 1.0%                 | DDDAD |             |      |             |                                                          |             |  |
|                | 1.0%                 | AAADD |             |      |             |                                                          |             |  |

D: GlcN; A: GlcNAc.



**Supplementary Table 3 | CSN-MN products after the hydrolysis of chitosan with F<sub>A</sub> 0.11-0.50.** Shown are the molar fractions of each oligomer with an abundance of  $\geq 1\%$  and their possible pattern of acetylation. When two or more patterns are given, sequencing of the oligomer was not complete. Data was gained by quantitative sequencing.

| F <sub>A</sub> | oligomer composition |                           |             |                           |             |                            |             |                         |
|----------------|----------------------|---------------------------|-------------|---------------------------|-------------|----------------------------|-------------|-------------------------|
|                | replicate 1          |                           | replicate 2 |                           | replicate 3 |                            | replicate 4 |                         |
| 0.11           | 37.8%                | DD                        | 35.2%       | DDD                       | 39.5%       | DD                         | 49.3%       | DD                      |
|                | 28.1%                | DDD                       | 33.2%       | DD                        | 25.0%       | DDD                        | 30.8%       | DDD                     |
|                | 9.2%                 | ADDD                      | 9.8%        | DADDD                     | 8.5%        | ADDD                       | 7.2%        | ADDD                    |
|                | 8.7%                 | DAADD                     | 5.3%        | ADDD                      | 6.6%        | DADDD                      | 3.8%        | DADD                    |
|                | 2.6%                 | DDADD                     | 4.0%        | DDADD                     | 4.0%        | DADD                       | 3.3%        | DDA                     |
|                | 2.3%                 | DADD                      | 2.1%        | DADD                      | 2.6%        | DDADD                      | 1.3%        | ADD                     |
|                | 1.9%                 | DDADD                     | 2.0%        | DDADD                     | 2.6%        | ADD                        |             |                         |
|                | 1.6%                 | ADADD<br>DAADD            | 1.2%        | ADADD<br>DAADD            | 1.7%        | ADADD<br>DAADD             |             |                         |
|                | 1.4%                 | ADD                       | 1.1%        | DDA                       | 1.6%        | DAADD<br>DADADD            |             |                         |
|                | 1.3%                 | DAADD<br>DADDAD           | 1.0%        | DAADD<br>DADDAD<br>DADDDA | 1.1%        | DDADD                      |             |                         |
|                | 1.0%                 | ADADD<br>ADDAD            |             |                           | 1.1%        | ADADD<br>ADDAD<br>ADDDA    |             |                         |
|                |                      |                           |             |                           | 1.0%        | ADADD<br>DAADD             |             |                         |
| 0.19           | 29.4%                | DD                        | 27.5%       | DDD                       | 32.9%       | DD                         | 32.7%       | DD                      |
|                | 21.4%                | DDD                       | 27.4%       | DD                        | 18.5%       | DDD                        | 21.2%       | DDD                     |
|                | 11.5%                | ADDD                      | 13.4%       | DADDD                     | 13.7%       | ADDD                       | 14.7%       | DADDD                   |
|                | 11.3%                | DADDD                     | 9.0%        | ADDD                      | 10.4%       | DADDD                      | 10.5%       | ADDD                    |
|                | 3.9%                 | DADD                      | 4.7%        | DDADD                     | 4.8%        | DADD                       | 3.7%        | DDADD                   |
|                | 2.5%                 | ADADD<br>DAADD            | 3.0%        | DDADD                     | 4.5%        | ADADD<br>DAADD             | 3.1%        | DADD                    |
|                | 2.2%                 | ADD                       | 2.5%        | DADD                      | 3.7%        | ADD                        | 1.8%        | DDA                     |
|                | 2.1%                 | DDADD                     | 2.5%        | ADADD<br>DAADD            | 2.6%        | ADADD<br>ADDDA             | 1.7%        | ADDAD<br>DADAD          |
|                | 2.1%                 | ADADD<br>ADDADD<br>ADDDDA | 1.9%        | DAADD<br>DADADD           | 2.5%        | DDADD                      | 1.6%        | DAADD<br>DADAD<br>DADDA |
|                | 2.0%                 | DDADD                     | 1.5%        | ADADD<br>DAADD            | 2.3%        | DAADD<br>DADDA             | 1.5%        | AADDD                   |
|                | 2.0%                 | DAADD<br>DADADD<br>DADDDA | 1.1%        | ADD                       | 1.4%        | DDAD                       | 1.4%        | ADADD<br>ADDAD<br>ADDDA |
|                | 1.8%                 | ADADD<br>DAADD            | 1.0%        | AADDD                     | 1.0%        | DAD                        | 1.3%        | ADD                     |
|                | 1.7%                 | DAADD<br>DADAD<br>DADDA   | 1.0%        | DDDDA                     |             |                            | 1.0%        | DDDDD                   |
|                | 1.4%                 | ADADD<br>ADDAD<br>ADDDA   | 1.0%        | ADADD<br>ADDDA            |             |                            |             |                         |
|                | 1.3%                 | DDAD                      | 1.0%        | ADADD<br>ADDADD           |             |                            |             |                         |
|                | 1.1%                 | ADDADD<br>DADADD          |             |                           |             |                            |             |                         |
|                | 1.0%                 | AADDD                     |             |                           |             |                            |             |                         |
|                | 1.0%                 | DDDAD                     |             |                           |             |                            |             |                         |
| 1.0%           | ADDAD<br>DADAD       |                           |             |                           |             |                            |             |                         |
| 0.35           | 20.4%                | DD                        | 20.3%       | DD                        | 20.8%       | DD                         | 23.5%       | DD                      |
|                | 16.4%                | ADDD                      | 17.0%       | DDD                       | 14.3%       | ADDD                       | 16.2%       | DADDD                   |
|                | 11.3%                | DADDD                     | 15.7%       | DADDD                     | 11.4%       | DADDD                      | 14.5%       | ADDD                    |
|                | 11.2%                | DDD                       | 13.9%       | ADDD                      | 8.9%        | DDD                        | 13.0%       | DDD                     |
|                | 5.8%                 | ADADD<br>DAADD            | 5.8%        | ADADD<br>DAADD            | 6.3%        | DADD                       | 5.6%        | ADADD<br>DAADD          |
|                | 4.2%                 | DADD                      | 4.3%        | DAADD<br>DADADD           | 6.1%        | ADADD<br>DAADD             | 5.0%        | DAADD<br>DADDA          |
|                | 3.9%                 | ADADD<br>ADDADD<br>ADDDDA | 3.9%        | DADD                      | 5.7%        | ADADD<br>DAADD             | 4.7%        | DDADD                   |
|                | 3.6%                 | DAADD<br>DADADD<br>DADDDA | 3.8%        | DDADD                     | 4.7%        | ADADD<br>ADDAD<br>ADDDA    | 4.2%        | DADD                    |
|                | 3.6%                 | ADD                       | 3.5%        | DDADD                     | 4.6%        | ADD                        | 3.0%        | AADDD                   |
|                | 3.5%                 | DDADD                     | 3.5%        | AADDD                     | 4.2%        | DAADD<br>DADADD<br>DADDDAD | 2.1%        | ADD                     |

D: GlcN; A: GlcNAc.

Supplementary Table 3 | Continued

| F <sub>A</sub> | oligomer composition       |                                                |                |                                                                             |                            |                                                         |             |                         |
|----------------|----------------------------|------------------------------------------------|----------------|-----------------------------------------------------------------------------|----------------------------|---------------------------------------------------------|-------------|-------------------------|
|                | replicate 1                |                                                | replicate 2    |                                                                             | replicate 3                |                                                         | replicate 4 |                         |
| 0.35           | 3.2%                       | ADADD<br>DAADD                                 | 2.6%           | ADADDD<br>ADDADD                                                            | 3.3%                       | DAADD<br>DADAD<br>DADDA                                 | 2.1%        | ADADD<br>ADDDA          |
|                | 3.2%                       | DAADD<br>DADAD                                 | 2.4%           | ADADD<br>DAADD                                                              | 3.0%                       | ADADDD<br>ADDADD<br>ADDAD                               | 1.8%        | DDA                     |
|                | 3.1%                       | ADADD<br>ADDAD                                 | 2.3%           | DAADD<br>DADDA                                                              | 2.3%                       | DDADD                                                   | 1.6%        | DDAD                    |
|                | 3.1%                       | ADDAD<br>DADAD                                 | 1.8%           | ADD                                                                         | 2.2%                       | AADDD                                                   | 1.5%        | ADDDA<br>DADDA          |
|                | 2.9%                       | AADDD                                          | 1.2%           | ADDADD<br>DADADD                                                            | 2.1%                       | ADDAD<br>DADAD<br>DDAAD                                 | 1.4%        | DDDDD                   |
|                | 1.8%                       | ADDADD<br>ADDDA<br>DADADD<br>DADDDA            |                |                                                                             | 1.9%                       | ADDAD<br>ADDDA<br>DADAD<br>DADDA                        | 1.0%        | ADAD<br>ADDA            |
|                | 1.7%                       | DDADDD                                         |                |                                                                             | 1.9%                       | DDAD                                                    |             |                         |
|                | 1.5%                       | DDAD                                           |                |                                                                             | 1.5%                       | ADDADD<br>ADDDAD<br>DADADD<br>DADDD                     |             |                         |
|                | 1.5%                       | ADDADD<br>DADADD<br>DDAADD                     |                |                                                                             | 1.2%                       | AADADD<br>AADAD<br>AADDDA<br>ADAADD<br>ADADAD<br>ADADDA |             |                         |
|                | 1.4%                       | ADDDDA<br>DADDDA<br>DDADDA                     |                |                                                                             | 1.2%                       | ADAD<br>DAAD                                            |             |                         |
|                | 1.1%                       | ADAD<br>ADDA                                   |                |                                                                             | 1.2%                       | ADDAD<br>DADDD<br>DDADAD                                |             |                         |
| 1.0%           | ADAD<br>DAAD               |                                                |                | 1.0%                                                                        | ADDADD<br>DADADD<br>DDAADD |                                                         |             |                         |
| 0.50           | 15.7%                      | DD                                             | 15.2%          | ADDD                                                                        | 15.7%                      | DD                                                      | 17.4%       | ADDD                    |
|                | 15.2%                      | ADDD                                           | 14.1%          | DD                                                                          | 15.1%                      | ADDD                                                    | 17.4%       | DD                      |
|                | 8.9%                       | ADADD<br>DAADD                                 | 13.6%          | DADDD                                                                       | 8.4%                       | DADDD                                                   | 13.3%       | DADDD                   |
|                | 7.7%                       | ADADD<br>ADDAD                                 | 10.7%          | DDD                                                                         | 8.0%                       | ADADDD<br>DAADDD                                        | 10.0%       | DDD                     |
|                | 7.3%                       | DADDD                                          | 9.2%           | ADADDD<br>DAADDD                                                            | 7.6%                       | ADADD<br>DAADD                                          | 7.6%        | DAADD<br>DADAD<br>DADDA |
|                | 5.9%                       | DADD                                           | 6.9%           | AADDD                                                                       | 6.9%                       | ADADDD<br>ADDADD                                        | 7.0%        | AADDD                   |
|                | 5.9%                       | ADD                                            | 5.8%           | DAADDD<br>DADADD                                                            | 6.5%                       | DADD                                                    | 6.6%        | ADADD<br>DAADD          |
|                | 5.1%                       | AADDDD<br>ADADDD<br>ADDADD<br>ADDDDA           | 4.5%           | ADADDD<br>ADDADD                                                            | 6.0%                       | DAADD<br>DADAD                                          | 4.3%        | DADD                    |
|                | 4.8%                       | DAADDD<br>DADADD<br>DADDDA<br>DDAADD<br>DDADDA | 4.2%           | DADD                                                                        | 5.8%                       | ADD                                                     | 3.1%        | ADD                     |
|                | 4.8%                       | AADDDD<br>ADADDD<br>DAADDD                     | 3.4%           | DAADD<br>DADAD<br>DADDA                                                     | 5.7%                       | ADADD<br>ADDAD                                          | 3.1%        | ADADD<br>ADDAD<br>ADDDA |
|                | 4.7%                       | DAADD<br>DADAD                                 | 3.0%           | DDADDD                                                                      | 4.4%                       | DDD                                                     | 2.6%        | ADDDA<br>DADDA          |
|                | 4.7%                       | DDD                                            | 2.8%           | ADD                                                                         | 4.3%                       | AADDD                                                   | 2.2%        | DDA                     |
|                | 4.4%                       | ADDADD<br>DADADD<br>DDAADD                     | 2.7%           | ADADD<br>DAADD                                                              | 4.1%                       | ADDAD<br>DADAD                                          | 2.0%        | DDADD                   |
|                | 4.2%                       | AADDD                                          | 2.0%           | ADADD<br>ADDAD<br>ADDDA                                                     | 3.0%                       | ADAADD                                                  | 1.8%        | ADDA<br>DADA            |
|                | 3.5%                       | ADDAD<br>DADAD                                 | 1.9%           | DDADD                                                                       | 2.7%                       | DAADDD<br>DADADD                                        | 1.6%        | ADAD<br>ADDA            |
|                | 2.7%                       | ADAD<br>DAAD                                   | 1.7%           | ADDAD<br>DADAD                                                              | 1.9%                       | AADD                                                    | 1.6%        | AADD                    |
|                | 2.6%                       | ADAD<br>ADDA                                   | 1.5%           | AADADD<br>AADAD<br>ADAADD<br>ADADAD<br>ADDAAD<br>DAAADD<br>DAADAD<br>DADAAD | 1.8%                       | ADAD<br>DAAD                                            | 1.5%        | ADDAD<br>DADAD          |
|                | 1.8%                       | DDAD                                           | 1.0%           | DDA                                                                         | 1.6%                       | ADAD<br>ADDA                                            | 1.3%        | AAADD                   |
| 1.7%           | ADAADD<br>ADADAD<br>ADADDA | 1.0%                                           | ADDDA<br>DADDA | 1.6%                                                                        | ADDADD<br>DADADD           | 1.1%                                                    | DA          |                         |

D: GlcN; A: GlcNAc.

**Supplementary Table 3 | Continued**

| F <sub>A</sub> | oligomer composition |                            |             |                            |             |        |             |              |
|----------------|----------------------|----------------------------|-------------|----------------------------|-------------|--------|-------------|--------------|
|                | replicate 1          |                            | replicate 2 |                            | replicate 3 |        | replicate 4 |              |
| <b>0.50</b>    | 1.6%                 | AADADD<br>ADAADD<br>DAAADD | 1.0%        | AAADDD                     | 1.5%        | AAADDD | 1.1%        | DDAD         |
|                | 1.5%                 | DDADD                      | 1.0%        | AADADD<br>AADDAD<br>AADDAA | 1.4%        | DDADD  | 1.0%        | DAAD<br>DADA |
|                | 1.3%                 | AAADDD                     |             |                            | 1.2%        | DDADDD |             |              |
|                | 1.1%                 | AADD                       |             |                            | 1.1%        | DDAADD |             |              |
|                | 1.1%                 | DAAADD<br>DAADAD<br>DAADDA |             |                            | 1.0%        | AAADD  |             |              |
|                | 1.0%                 | AADDAD<br>ADADAD<br>DAADAD |             |                            |             |        |             |              |

D: GlcN; A: GlcNAc.

**Supplementary Table 4 | CSN-MHKI products after the hydrolysis of chitosan with FA 0.11-0.50.** Shown are the molar fractions of each oligomer with an abundance of  $\geq 1\%$  and their possible pattern of acetylation. When two or more patterns are given, sequencing of the oligomer was not complete. Data was gained by quantitative sequencing.

| F <sub>A</sub> | oligomer composition |                            |             |                  |             |                                  |             |                |
|----------------|----------------------|----------------------------|-------------|------------------|-------------|----------------------------------|-------------|----------------|
|                | replicate 1          |                            | replicate 2 |                  | replicate 3 |                                  | replicate 4 |                |
| 0.11           | 61.6%                | DD                         | 62.7%       | DD               | 60.1%       | DD                               | 65.2%       | DD             |
|                | 13.1%                | DADD                       | 12.9%       | DADD             | 11.5%       | DADD                             | 9.0%        | DADDD          |
|                | 11.4%                | DADDD                      | 11.5%       | DADDD            | 10.9%       | DADDD                            | 8.1%        | DADD           |
|                | 3.7%                 | ADDD                       | 3.3%        | ADDD             | 3.0%        | ADDD                             | 2.8%        | DA             |
|                | 2.0%                 | DAADDD<br>DADADD           | 2.0%        | DAADDD<br>DADADD | 2.4%        | DAADDD<br>DADADD                 | 2.7%        | ADDD           |
|                | 1.5%                 | ADD                        | 1.3%        | ADD              | 2.2%        | DAADD<br>DADAD<br>DADDA          | 1.8%        | DDD            |
|                | 1.5%                 | ADADDD<br>DAADDD           | 1.3%        | ADDADD<br>DADADD | 1.5%        | ADADDD<br>DAADDD                 | 1.7%        | DADDA          |
|                | 1.3%                 | ADDADD<br>DADADD           | 1.1%        | ADADDD<br>DAADDD | 1.3%        | ADDADD<br>DADADD                 | 1.0%        | DAADD<br>DADAD |
|                | 1.0%                 | AADDD                      | 1.0%        | ADADD<br>DAADD   | 1.2%        | DDADD                            |             |                |
|                |                      |                            |             |                  | 1.2%        | DA                               |             |                |
|                |                      |                            |             |                  | 1.1%        | DAD                              |             |                |
|                |                      |                            |             |                  | 1.1%        | ADD                              |             |                |
| 0.19           | 48.2%                | DD                         | 51.9%       | DD               | 48.7%       | DD                               | 53.6%       | DD             |
|                | 18.6%                | DADD                       | 17.9%       | DADD             | 12.9%       | DADD                             | 13.4%       | DADDD          |
|                | 11.0%                | DADDD                      | 12.8%       | DADDD            | 11.2%       | DADDD                            | 12.1%       | DADD           |
|                | 5.0%                 | ADDD                       | 4.2%        | ADDD             | 5.5%        | ADDD                             | 4.4%        | ADDD           |
|                | 3.9%                 | DAADDD<br>DADADD           | 2.5%        | DAADD            | 3.9%        | DAADDD<br>DADADD                 | 3.6%        | DAADD<br>DADDA |
|                | 2.6%                 | ADD                        | 2.3%        | ADD              | 3.1%        | ADDADD<br>DADADD                 | 2.5%        | ADDDA<br>DADDA |
|                | 2.3%                 | ADDADD<br>DADADD           | 2.1%        | AADDD            | 3.0%        | ADD                              | 2.1%        | ADADD<br>DAADD |
|                | 2.2%                 | ADADDD<br>DAADDD           | 1.1%        | DDADD            | 2.5%        | ADADD<br>ADDAD<br>DAADD<br>DADAD | 1.7%        | DA             |
|                | 2.1%                 | AADDD                      |             |                  | 2.2%        | DAADD<br>DADAD<br>DADDA          | 1.7%        | AADDD          |
|                | 1.7%                 | DAADD<br>DADAD             |             |                  | 1.7%        | DAD                              | 1.3%        | ADD            |
|                |                      |                            |             |                  | 1.6%        | ADADDD<br>DAADDD                 | 1.0%        | DDADD          |
|                |                      |                            |             |                  | 1.5%        | AADDD                            | 1.0%        | ADADD<br>ADDDA |
|                |                      |                            |             | 1.2%             | DDADD       |                                  |             |                |
| 0.35           | 28.5%                | DD                         | 33.2%       | DD               | 32.0%       | DD                               | 37.2%       | DD             |
|                | 26.7%                | DADD                       | 23.0%       | DADD             | 20.4%       | DADD                             | 18.7%       | DADD           |
|                | 9.9%                 | DADDD                      | 11.8%       | DADDD            | 13.5%       | DADDD                            | 14.5%       | DADDD          |
|                | 5.5%                 | DAADDD<br>DADADD<br>DADDDA | 5.3%        | DAADDD<br>DADADD | 6.7%        | DAADDD<br>DADADD<br>DADDDA       | 7.2%        | DAADD<br>DADDA |
|                | 5.3%                 | ADDD                       | 5.1%        | DAADD<br>DADAD   | 4.3%        | DAADD                            | 5.8%        | ADADD<br>DAADD |
|                | 4.9%                 | DAADD                      | 5.0%        | ADDD             | 3.8%        | AADDD                            | 4.2%        | ADDD           |
|                | 4.1%                 | ADD                        | 4.0%        | AADDD            | 3.6%        | ADDADD<br>DADADD                 | 3.6%        | AADDD          |
|                | 4.1%                 | ADADDD<br>DAADDD           | 3.2%        | ADADDD<br>DAADDD | 3.4%        | ADDD                             | 3.1%        | ADDDA<br>DADDA |
|                | 3.8%                 | AADDD                      | 3.2%        | ADD              | 2.9%        | ADADDD<br>DAADDD                 | 2.1%        | ADD            |
|                | 2.4%                 | ADDADD<br>DADADD           | 2.8%        | ADDADD<br>DADADD | 2.0%        | ADD                              | 1.6%        | ADADD<br>ADDDA |
|                | 1.8%                 | ADADDD<br>ADDADD<br>ADDDDA | 2.1%        | DDADD            | 1.5%        | DADDA                            | 1.4%        | DA             |
|                | 1.5%                 | AADD                       | 1.2%        | AADD             | 1.4%        | DAD                              | 1.3%        | AADD           |
|                | 1.3%                 | ADADD                      |             |                  | 1.3%        | ADDAD<br>DADAD                   | 1.1%        | DADA           |
|                | 1.2%                 | AADADD<br>ADAADD<br>DAAADD |             |                  | 1.2%        | ADADDD<br>ADDADD<br>ADDDAD       | 1.0%        | DDADD          |
|                |                      |                            |             |                  | 1.1%        | AADD                             | 1.0%        | DDDDD          |
|                |                      |                            |             |                  | 1.1%        | AADADD<br>DAAADD                 |             |                |

D: GlcN; A: GlcNAc.

Supplementary Table 4 | Continued

| F <sub>A</sub> | oligomer composition |       |             |                  |                            |                                      |             |              |
|----------------|----------------------|-------|-------------|------------------|----------------------------|--------------------------------------|-------------|--------------|
|                | replicate 1          |       | replicate 2 |                  | replicate 3                |                                      | replicate 4 |              |
| <b>0.50</b>    | 29.5%                | DADD  | 23.1%       | DADD             | 22.6%                      | DADD                                 | 49.5%       | DD           |
|                | 22.2%                | DD    | 19.4%       | DD               | 19.4%                      | DD                                   | 25.7%       | DADD         |
|                | 9.0%                 | DAADD | 7.9%        | DAADD            | 9.8%                       | DAADD<br>DADAD                       | 5.4%        | ADDD         |
|                | 8.1%                 | DADDD | 7.7%        | DADDD            | 6.8%                       | DADDD                                | 4.3%        | ADD          |
|                | 7.0%                 | AADDD | 7.4%        | DAADDD<br>DADADD | 6.7%                       | ADDD                                 | 3.4%        | ADDA<br>DADA |
|                | 6.3%                 | ADD   | 6.6%        | ADDADD<br>DADADD | 5.3%                       | DAADDD<br>DADADD<br>DADDAD           | 3.0%        | DA           |
|                | 5.9%                 | AADD  | 6.2%        | ADDD             | 4.4%                       | ADD                                  | 2.9%        | AADD         |
|                | 4.2%                 | AADD  | 6.0%        | ADD              | 3.8%                       | AADDD                                | 2.2%        | ADAD<br>ADDA |
|                | 2.6%                 | ADADD | 5.9%        | AADDD            | 3.7%                       | ADADDD<br>DAADDD                     | 1.9%        | DDAD         |
|                |                      |       | 3.8%        | AADD             | 2.7%                       | ADAADD<br>ADADAD<br>DAAADD<br>DAADAD | 1.8%        | DAAD<br>DADA |
|                |                      |       | 2.3%        | ADADD            | 2.7%                       | AADADD<br>ADAADD<br>DAAADD           | 1.6%        | DDDD         |
|                |                      |       | 1.6%        | AADADD           | 2.5%                       | ADADD<br>ADDAD                       |             |              |
|                |                      |       | 1.6%        | ADADDD<br>DAADDD | 2.4%                       | ADDADD<br>DADADD                     |             |              |
|                |                      |       | 1.6%        | DAAADD           | 2.4%                       | ADADDD<br>ADDADD<br>ADDAD            |             |              |
|                |                      |       | 1.0%        | DDAD             | 2.1%                       | AADD                                 |             |              |
|                |                      |       |             |                  | 1.8%                       | DAD                                  |             |              |
|                |                      |       |             |                  | 1.7%                       | DAAD<br>DADA                         |             |              |
|                |                      |       |             |                  | 1.7%                       | ADAD<br>DAAD                         |             |              |
|                |                      |       |             |                  | 1.5%                       | ADDAD<br>DADDAD                      |             |              |
|                |                      |       |             |                  | 1.5%                       | ADAADD<br>ADADAD<br>ADDAAD           |             |              |
|                |                      |       |             | 1.5%             | DAAADD<br>DAADAD<br>DADAAD |                                      |             |              |
|                |                      |       |             | 1.1%             | ADDD                       |                                      |             |              |

D: GlcN; A: GlcNAc.

**Supplementary Table 5 | Relative abundancies (molar fraction) of patterns at the reducing and non-reducing ends of oligomers in the early phase of hydrolysis (15 min).** Oligomers were produced from chitosans with  $F_A$  0.11-0.50 using CSN174, CSN-7M, CSN-MN, and CSN-MHKI. Shown are the mean values with standard deviations of three independent measurements of three independent enzyme batches.

|                                       | reducing ends<br>unknown pattern     | reducing end dyad frequencies     |            |             |              |
|---------------------------------------|--------------------------------------|-----------------------------------|------------|-------------|--------------|
|                                       |                                      | AA                                | AD         | DA          | DD           |
| <b>CSN-174 <math>F_A</math> 0.11</b>  | 0.0 ± 0.0%                           | 0.1 ± 0.1%                        | 1.1 ± 0.1% | 9.8 ± 6.2%  | 89.0 ± 6.3%  |
| <b>CSN-174 <math>F_A</math> 0.50</b>  | 0.0 ± 0.0%                           | 1.1 ± 1.3%                        | 4.4 ± 1.1% | 37.4 ± 6.4% | 57.1 ± 6.4%  |
| <b>CSN-7M <math>F_A</math> 0.11</b>   | 0.5 ± 0.5%                           | 0.5 ± 0.6%                        | 2.1 ± 0.4% | 1.8 ± 0.6%  | 95.5 ± 0.9%  |
| <b>CSN-7M <math>F_A</math> 0.50</b>   | 0.7 ± 0.9%                           | 0.4 ± 0.2%                        | 4.7 ± 1.6% | 1.7 ± 0.5%  | 93.2 ± 1.7%  |
| <b>CSN-MN <math>F_A</math> 0.11</b>   | 0.0 ± 0.0%                           | 0.7 ± 1.0%                        | 1.4 ± 1.5% | 0.9 ± 0.9%  | 97.0 ± 2.3%  |
| <b>CSN-MN <math>F_A</math> 0.50</b>   | 0.7 ± 1.0%                           | 0.6 ± 0.9%                        | 3.8 ± 5.3% | 2.3 ± 3.2%  | 93.3 ± 9.4%  |
| <b>CSN-MHKI <math>F_A</math> 0.11</b> | 0.0 ± 0.0%                           | 0.1 ± 0.1%                        | 0.7 ± 0.4% | 9.0 ± 12.0% | 90.2 ± 12.4% |
| <b>CSN-MHKI <math>F_A</math> 0.50</b> | 8.5 ± 11.2%                          | 4.1 ± 4.2%                        | 5.9 ± 5.5% | 6.0 ± 4.3%  | 83.9 ± 13.8% |
|                                       | non-reducing ends<br>unknown pattern | non-reducing end dyad frequencies |            |             |              |
|                                       |                                      | AA                                | AD         | DA          | DD           |
| <b>CSN-174 <math>F_A</math> 0.11</b>  | 0.0 ± 0.0%                           | 0.0 ± 0.1%                        | 1.4 ± 0.9% | 6.0 ± 1.8%  | 92.6 ± 2.4%  |
| <b>CSN-174 <math>F_A</math> 0.50</b>  | 0.0 ± 0.0%                           | 1.5 ± 1.1%                        | 4.1 ± 1.2% | 12.7 ± 4.9% | 81.7 ± 4.5%  |
| <b>CSN-7M <math>F_A</math> 0.11</b>   | 0.4 ± 0.5%                           | 0.3 ± 0.3%                        | 1.4 ± 0.1% | 6.9 ± 1.1%  | 91.4 ± 1.2%  |
| <b>CSN-7M <math>F_A</math> 0.50</b>   | 0.0 ± 0.0%                           | 0.6 ± 0.3%                        | 3.0 ± 1.0% | 21.5 ± 2.9% | 74.9 ± 3.8%  |
| <b>CSN-MN <math>F_A</math> 0.11</b>   | 0.2 ± 0.2%                           | 0.7 ± 1.0%                        | 0.4 ± 0.3% | 2.7 ± 3.6%  | 96.2 ± 3.5%  |
| <b>CSN-MN <math>F_A</math> 0.50</b>   | 0.0 ± 0.0%                           | 0.9 ± 1.3%                        | 2.6 ± 3.7% | 9.6 ± 13.6% | 86.6 ± 18.6% |
| <b>CSN-MHKI <math>F_A</math> 0.11</b> | 0.0 ± 0.0%                           | 0.0 ± 0.1%                        | 1.4 ± 0.5% | 6.8 ± 1.1%  | 91.9 ± 1.6%  |
| <b>CSN-MHKI <math>F_A</math> 0.50</b> | 8.1 ± 11.5%                          | 4.1 ± 4.2%                        | 5.3 ± 3.0% | 14.4 ± 9.3% | 76.3 ± 15.5% |

D: GlcN; A: GlcNAc.

**Supplementary Table 6 | Pattern distribution of mono-acetylated oligomers with DP 3-6 produced with CSN-7M.** Given are the molar fractions of each oligomer at the end point of hydrolysis. Shown are the mean values with standard deviations of three independent measurements of three independent enzyme batches.

| oligomer                      | pattern of acetylation | mole fraction       |                     |                     |                     |
|-------------------------------|------------------------|---------------------|---------------------|---------------------|---------------------|
|                               |                        | F <sub>A</sub> 0.11 | F <sub>A</sub> 0.19 | F <sub>A</sub> 0.35 | F <sub>A</sub> 0.50 |
| D <sub>4</sub>                | DDDD                   | 0.4 ± 0.0%          | 0.5 ± 0.0%          | 1.2 ± 0.8%          | 0.8 ± 0.2%          |
| D <sub>2</sub> A <sub>1</sub> | DDA                    | 0.4 ± 0.0%          | 0.4 ± 0.0%          | 0.3 ± 0.0%          | 0.4 ± 0.2%          |
|                               | DAD                    | 0.4 ± 0.0%          | 0.4 ± 0.0%          | 0.2 ± 0.0%          | 0.6 ± 0.5%          |
|                               | ADD                    | 3.0 ± 0.1%          | 3.7 ± 0.2%          | 1.5 ± 0.1%          | 4.5 ± 2.7%          |
| D <sub>3</sub> A <sub>1</sub> | DDDA                   | 0.3 ± 0.0%          | 0.3 ± 0.0%          | 0.4 ± 0.0%          | 0.3 ± 0.2%          |
|                               | DDAD                   | 1.2 ± 0.2%          | 1.3 ± 0.3%          | 0.3 ± 0.2%          | 0.4 ± 0.0%          |
|                               | DADD                   | 2.9 ± 0.3%          | 4.1 ± 0.6%          | 3.8 ± 1.1%          | 5.2 ± 1.3%          |
|                               | ADDD                   | 6.3 ± 0.2%          | 8.7 ± 0.3%          | 11.3 ± 1.1%         | 11.2 ± 2.4%         |
| D <sub>4</sub> A <sub>1</sub> | DDDDA                  | 0.0 ± 0.0%          | 0.1 ± 0.1%          | 0.6 ± 0.1%          | 0.0 ± 0.1%          |
|                               | DDDAD                  | 0.0 ± 0.0%          | 0.0 ± 0.0%          | 0.0 ± 0.0%          | 0.3 ± 0.5%          |
|                               | DDADD                  | 1.8 ± 0.1%          | 3.5 ± 0.3%          | 6.5 ± 0.6%          | 3.4 ± 1.8%          |
|                               | DADDD                  | 5.8 ± 0.5%          | 7.4 ± 0.3%          | 20.2 ± 0.7%         | 13.7 ± 7.5%         |
|                               | ADDDD                  | 0.1 ± 0.1%          | 0.2 ± 0.2%          | 1.3 ± 1.3%          | 0.2 ± 0.1%          |
| D <sub>5</sub> A <sub>1</sub> | DDDDDA                 | 0.0 ± 0.0%          | 0.0 ± 0.0%          | 0.1 ± 0.1%          | 0.0 ± 0.0%          |
|                               | DDDDAD                 | 0.0 ± 0.0%          | 0.0 ± 0.0%          | 0.0 ± 0.1%          | 0.0 ± 0.0%          |
|                               | DDDADD                 | 0.0 ± 0.0%          | 0.0 ± 0.0%          | 0.0 ± 0.0%          | 0.2 ± 0.3%          |
|                               | DDADDD                 | 0.0 ± 0.0%          | 0.1 ± 0.2%          | 3.6 ± 0.6%          | 1.7 ± 1.2%          |
|                               | DADDDD                 | 0.0 ± 0.0%          | 0.0 ± 0.0%          | 0.1 ± 0.1%          | 0.1 ± 0.1%          |
|                               | ADDDDD                 | 0.0 ± 0.0%          | 0.0 ± 0.1%          | 0.4 ± 0.4%          | 0.1 ± 0.1%          |

D: GlcN; A: GlcNAc.

**Supplementary Table 7 | MS parameters for tandem MS of re-N-acetylated <sup>18</sup>O-labelled chitosan oligomers.** Shown is an exemplary setup, as the elution time was adjusted for each set of measurement.

| Elution time [min] | Target mass [m/z] | Mass [m/z] | Sequence | Width | Cut-Off | Amplitude [%] |
|--------------------|-------------------|------------|----------|-------|---------|---------------|
| 0-4                | 200               | -          | -        | -     | -       | -             |
| 4-7.5              | 420               | 430.2      | A1D1     | 2     | 116     | 85            |
| 7.5-11.5           | 630               | 633.2      | A2D1     | 2     | 171     | 90            |
| 7.5-11.5           | 630               | 636.2      | A1D2     | 2     | 172     | 90            |
| 11.5-15.5          | 840               | 836.3      | A3D1     | 1.5   | 226     | 100           |
| 11.5-15.5          | 840               | 839.3      | A2D2     | 1.5   | 227     | 100           |
| 11.5-15.5          | 840               | 842.3      | A1D3     | 1.5   | 227     | 100           |
| 15.5-19            | 1040              | 1039.4     | A4D1     | 1.5   | 281     | 100           |
| 15.5-19            | 1040              | 1042.4     | A3D2     | 1.5   | 281     | 100           |
| 15.5-19            | 1040              | 1045.4     | A2D3     | 1.5   | 282     | 100           |
| 15.5-19            | 1040              | 1048.4     | A1D4     | 1.5   | 283     | 100           |
| 19-23.5            | 1240              | 1242.5     | A5D1     | 1.5   | 335     | 110           |
| 19-23.5            | 1240              | 1245.5     | A4D2     | 1.5   | 336     | 110           |
| 19-23.5            | 1240              | 1248.5     | A3D3     | 1.5   | 337     | 110           |
| 19-23.5            | 1240              | 1251.5     | A2D4     | 1.5   | 338     | 110           |
| 19-23.5            | 1240              | 1254.5     | A1D5     | 1.5   | 339     | 110           |

D: GlcN; A: GlcNAc.

**Supplementary Table 8 | List of pectin samples used.**

| Pectin substrate                  | Abbreviation | Supplier                               | DM     |
|-----------------------------------|--------------|----------------------------------------|--------|
| polymeric pectin C                | PC           | Carl Roth GmbH<br>(Karlsruhe, Germany) | ≈ 70%  |
| polymeric pectin from apple       | PAP          | Carl Roth GmbH<br>(Karlsruhe, Germany) | ≈ 38%  |
| polymeric pectin from citrus peel | PCP          | Fluka<br>(Buchs, Switzerland)          | 63-66% |

DM: degree of methyl esterification.

**Supplementary Table 9 | List of pectin degrading enzymes used.**

| Enzyme                                                    | Abbreviation | Supplier                                     |
|-----------------------------------------------------------|--------------|----------------------------------------------|
| endo-Polygalacturonanase<br>from <i>Aspergillus niger</i> | PG           | Megazyme (Bray, Ireland)<br>Lot No. MPG00901 |
| Pectate lyase<br>from <i>Aspergillus sp.</i>              | PL           | Megazyme (Bray, Ireland)<br>Lot No 10801     |

**Supplementary Table 10 | HILIC parameters for LC- MS measurements of pectin oligomers.**

| time [min] | eluent                    |
|------------|---------------------------|
| 0-2.5      | 100% A                    |
| 2.5-15     | linear gradient to 100% B |
| 15-17      | 100% B                    |
| 17-17.5    | linear gradient to 100% A |
| 17.5-20    | 100% A                    |
